# Supplementary material for: Template synthesis of hollow fusiform RuO2·xH2O nanostructure and its supercapacitor performance
Source: Royal Society of Chemistry journal article supplement (doi:10.1039/c2ta00622g), 2012-10-30
Supplement: c2ta00622g.pdf [file c2ta00622g.pdf]

Electronic Supplementary Information (ESI)

## Template Synthesis of Hollow Fusiform Ruthenium Oxides and its supercapacitor performance

### I. Experimental Details:

**Synthesis:** All the reagents were analytical grade and utilized without further purification.  $\alpha$ -Fe<sub>2</sub>O<sub>3</sub> nanospindles were first prepared by a simple hydrothermal approach as described in our previous work<sup>[1]</sup>. Typically, to prepare  $\alpha$ -Fe<sub>2</sub>O<sub>3</sub> nanospindles, 0.541 g FeCl<sub>3</sub>•6H<sub>2</sub>O and 3.0 mg NaH<sub>2</sub>PO<sub>4</sub>•2H<sub>2</sub>O were dissolved in 80 mL deionized water and transferred to a Teflon-lined autoclave (100 mL), then heated at 100 °C for 48 h in an electric oven. The final precipitate was centrifuged and washed with deionized water and ethanol several times and dried at 60 °C in an electric oven. To obtain the hollow fusiform ruthenium oxides, 0.02 g of the prepared  $\alpha$ -Fe<sub>2</sub>O<sub>3</sub>, 0.05 g RuCl<sub>3</sub>•3H<sub>2</sub>O and 1 mL HCl were dissolved in 70 mL deionized water and ultrasonicated for 30 min to give a well-distributed solution. Then the mixed solution was transferred into a 100 mL Teflon-lined autoclave and maintained at 180 °C for 6 h. After washing three times with distilled water, the black product was added to 1 M hydrochloric acid solution and placed for 1 day at 80 °C to remove the  $\alpha$ -Fe<sub>2</sub>O<sub>3</sub> template completely. The final product was collected by centrifugation after being washed with distilled water several times and finally dried at 60 °C.

**Characterizations:** The as-prepared products were characterized with X-ray powder diffractometer (XRD, X'Pert PRO MRD, PANalytical, Netherlands), scanning electron microscopy (SEM; JEOL, JSM-6700F), and transmission electron microscopy (TEM; JEM-2100 (HR), 200 kV). The EDS tests were carried out on the energy dispersive X-ray spectrometer (EDS) which was equipped on the SEM of QUANT200. The BET specific surface area was measured on a Bel Sorp-mini (S/N-00230).

**Electrochemical measurements:** All the electrochemical measurements (cyclic voltammetry and constant current charge-discharge) were performed on a CHI 440A electrochemical workstation (Shanghai CH Instrument, China) with a conventional three-electrode system composed of a working electrode, a platinum plate as auxiliary electrode and a saturated calomel electrode (SCE) as reference electrode. The working electrodes were prepared by mixing the active materials (85 wt%), acetylene black (10 wt%) and polyvinylidene fluoride (PVDF, 5 wt%) in isopropyl alcohol together and then coated on a platinum foil and dried naturally for about 12 h. All the electrochemical experiments were carried out in 1 M H<sub>2</sub>SO<sub>4</sub> solution at room temperature.

## II. Figures:

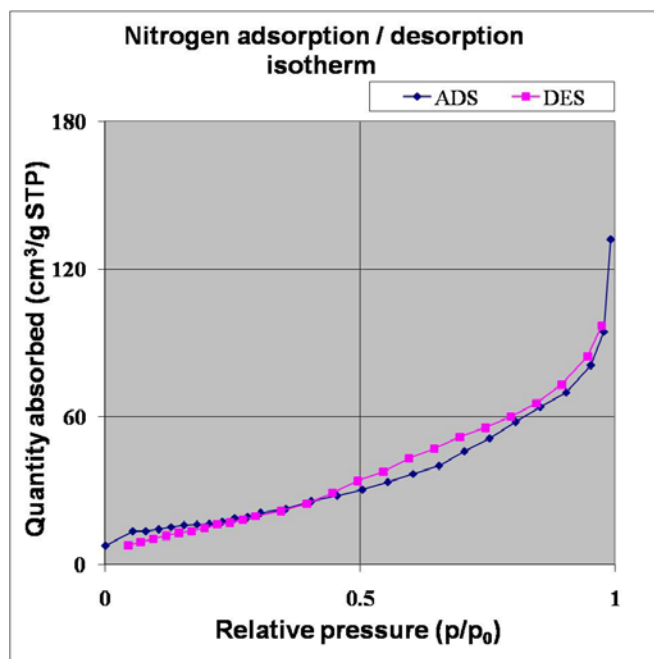

**Fig.S1.** Nitrogen adsorption–desorption isotherms of the as-prepared hollow fusiform  $\text{RuO}_2 \cdot x\text{H}_2\text{O}$

**Fig.S2.** Thermogravimetric analysis (TGA) curve of as-prepared  $\text{RuO}_2 \cdot x\text{H}_2\text{O}$ . The weight loss of the sample is 12.1 %, reveals the oxide has a composition of  $\text{RuO}_2 \cdot 1.08\text{H}_2\text{O}$ .

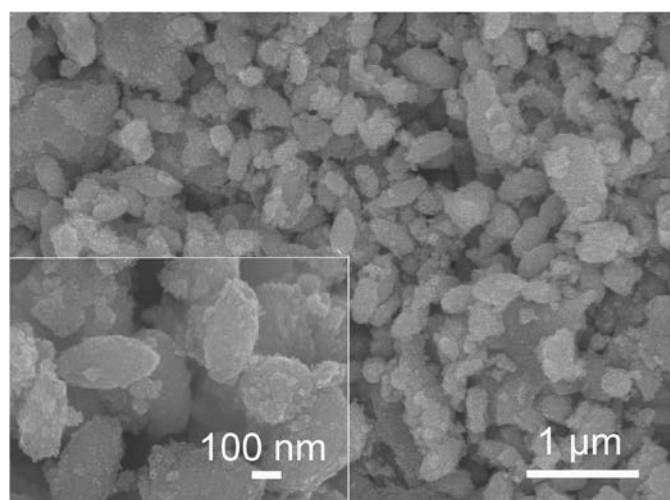

**Fig.S3.** SEM of the sample prepared with no HCl added into the reaction solution. The inset shows enlarged image.

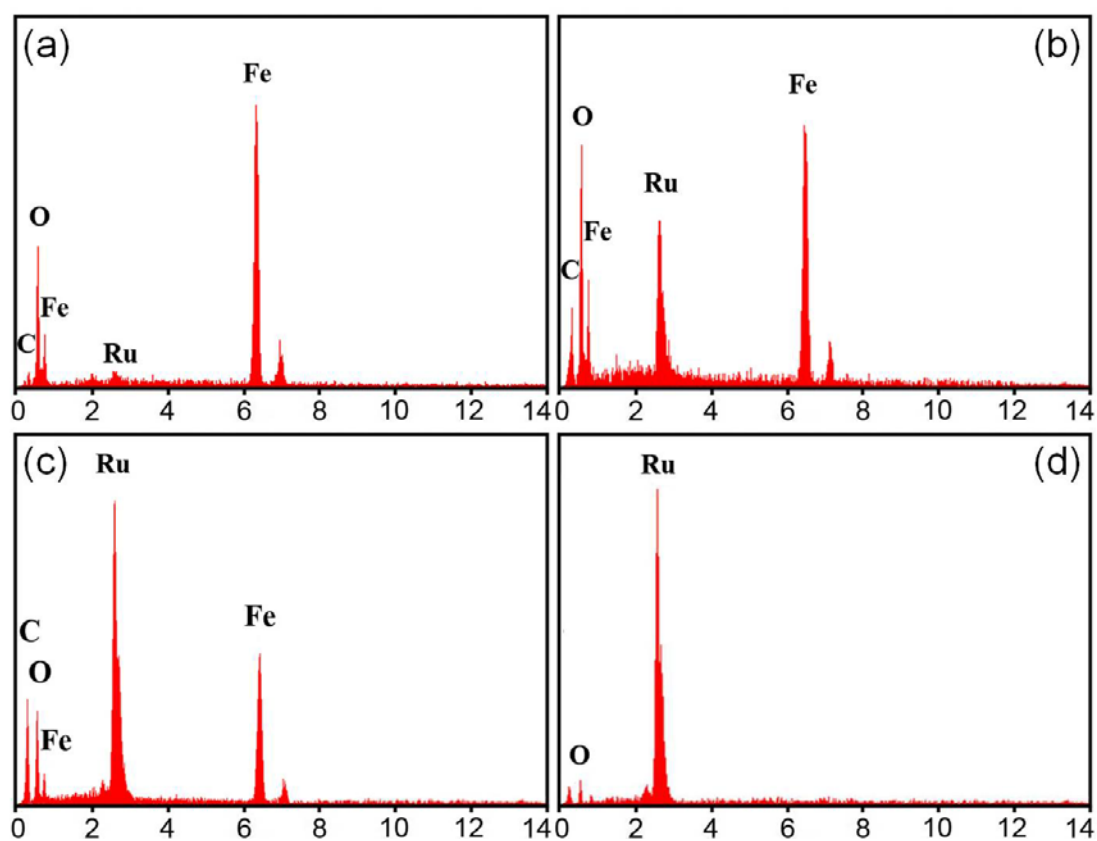

**Fig.S4.** The EDX results of the samples collected after (a) 30min, (b) 1h, (c) 6h reaction and (d) the final hollow fusiform  $\text{RuO}_2 \cdot x\text{H}_2\text{O}$ .

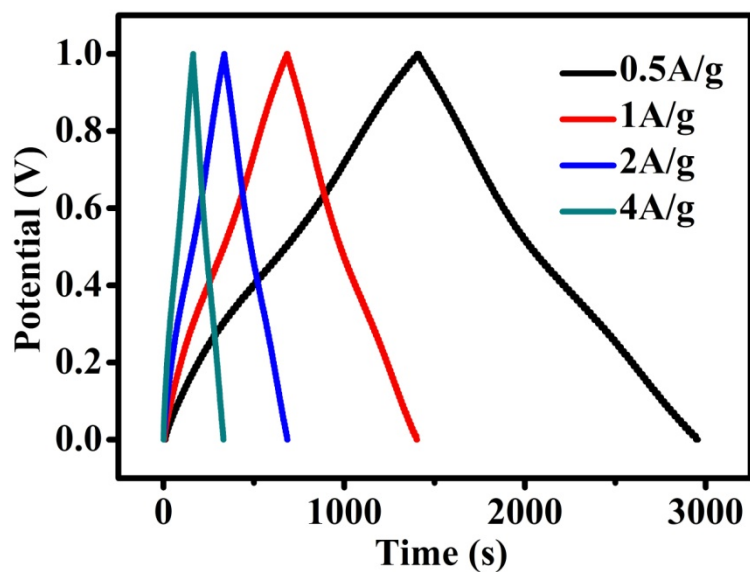

**Fig.S5.** Charge-discharge curves of the hollow fusiform RuO<sub>2</sub>·xH<sub>2</sub>O electrode at the low current densities of 0.5, 1, 2 and 4Ag<sup>-1</sup> with the corresponding specific capacitances of 772,718,698 and 671Fg<sup>-1</sup>, respectively.

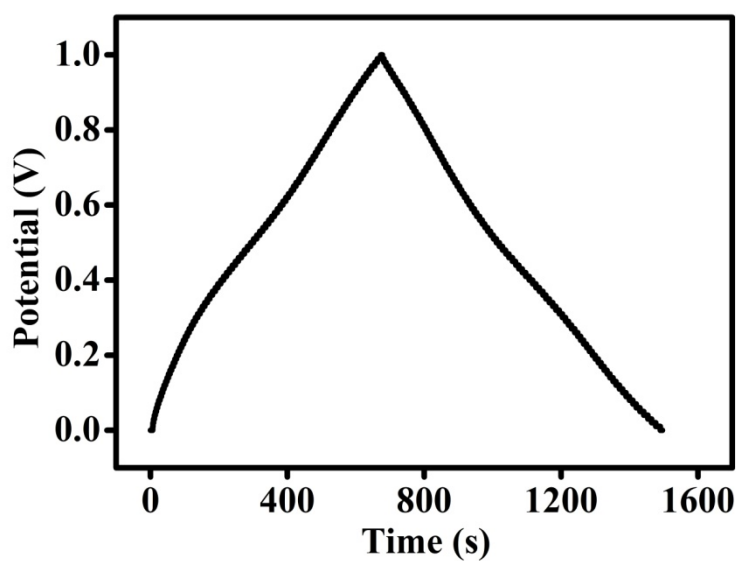

**Fig.S6.** Charge-discharge curve of the hollow fusiform RuO<sub>2</sub>·xH<sub>2</sub>O electrode after 1000 cycles at the current density of 1Ag<sup>-1</sup> (the charge time is 672s and discharge time is 823s).

References:

- [1] Y. Ke, Y. Zeng, X. L. Pu, L. F. Li, X. Wu, Z. H. Zhu and Y. Yu, *RSC Adv.*, 2012, 2, 5676.
